# Supplementary material
Source: Springer Nature journal article supplement (https://www.springermedizin.de/resource/supplementary/12889_2009_2590_MOESM1_ESM.pdf/9486568)

**Cost Impact Factor**

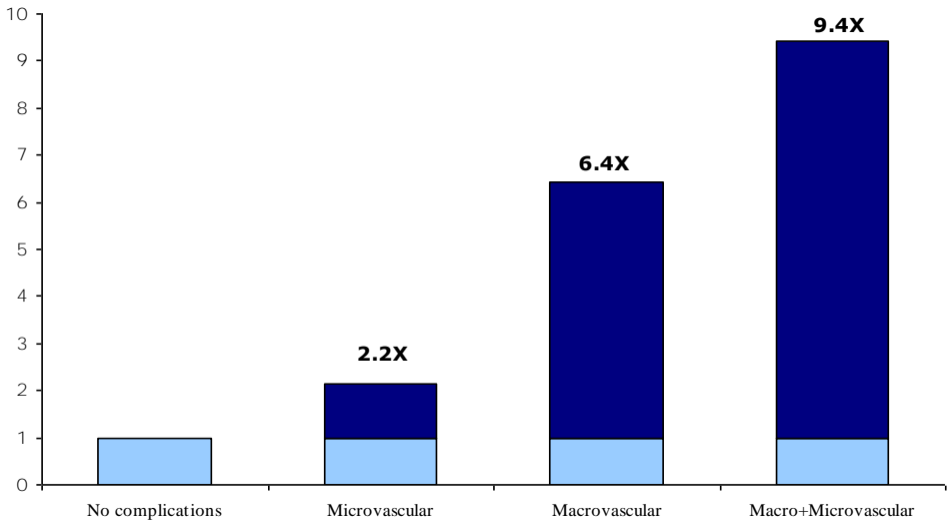

Supplement: MOESM1 [file 9486568]
